# Supplementary material
Source: Springer Nature journal article supplement (https://www.springermedizin.de/resource/supplementary/12889_2011_3356_MOESM1_ESM.pdf/9488686)
Supplement: MOESM1 [file 9488686]

**Figure 1: Other challenges to rapid acceleration of IMCI training – Results of Qualitative Data from National IMCI Focal Persons / NPOs:**

- **Strategic differences regarding the role of IMCI:**
  - IMCI is viewed as a vertical programme and not as a standard approach to managing sick children in health facilities (Uganda)
  - Lack of consensus amongst partners regarding IMCI as a delivery vehicle for child health interventions. Only two agencies are currently providing support for facility-based IMCI training (Nigeria)
- **Lack of political will / support:**
  - Lack of support by regional offices at MOH (Eritrea)
  - Lack of an MCH office within the MOH, and lack of clear division of roles and responsibilities (Kosovo)
  - Lack of commitment from government (Nepal)
- **Lack of resources (human, material, time) for IMCI implementation:**
  - Lack of fuel for transportation (Eritrea)
  - Lack of funds for supervision after training (Eritrea, Ethiopia)
  - Lack of funds and limited technical resources and funding for child health (Kosovo, Ghana, Cambodia, India)
  - Low per diem
  - Withdrawal of funders (Eritrea)
  - Pressure of time for training (Kazakhstan)
  - Facilitators being overloaded with work (Eritrea) / Lack of facilitators (Ghana, Moldova)
  - Shortage of PHC doctors (Kosovo)
  - Shortage of staff in health facilities (Kenya) / High staff turn-over (Ghana)
- **Poor reading ability of health workers (Vietnam)**
- **Mismatch between training needs and what is available:**
  - The capacity of the existing education system is not enough for re-training of all health workers
  - Lack of appropriate training sites (Cambodia)
  - Mismatch between number of health workers needing to be trained and long duration of the course - Large country with a high number of health facilities and health workers (Indonesia, China)
- **Other:**
  - Frequent changes in rules in the Ministry, resulting in discontinuity in work
  - Existing deficiencies in health service provision (Kosovo)
  - Lack of integration between information systems and IMCI (Kosovo)
  - Informal payments (Kosovo)
  - Drugs suggested by IMCI are not part of the drugs provided free of charge though the EDL (Kosovo)
